# Supplementary material
Source: PubMed Central journal article supplement (PMC3286298)
Supplement: supp_mol.111.076422_Supplemental_FigureLiang.pdf [file supp_mol.111.076422_Supplemental_FigureLiang.pdf]

**Sp1 Oscillation Is Involved in Copper Homeostasis Maintenance by Regulating hCtr1 Expression**

Zheng D. Liang, Wen-Bin Tsai, Mei-Yi Lee, Niramol Savaraj, and Macus Tien Kuo

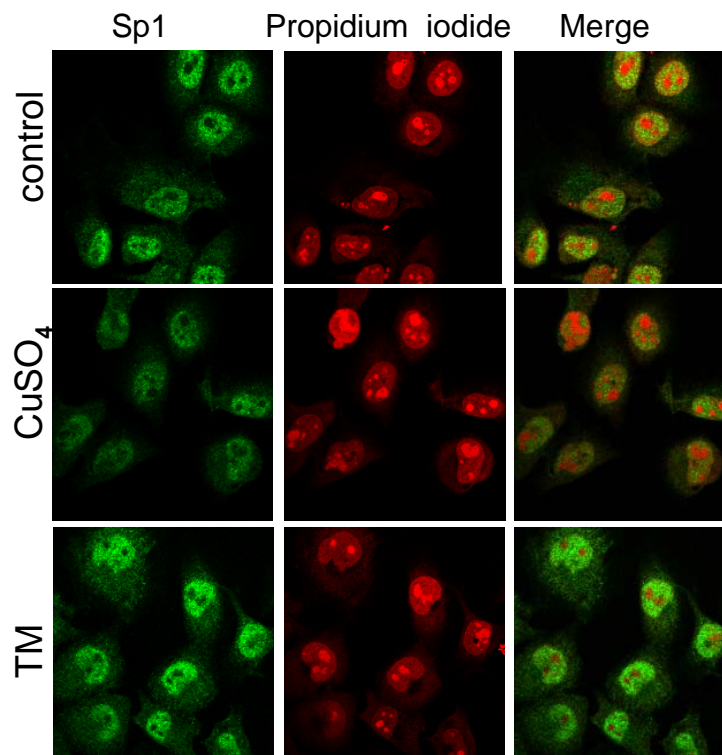

Figure 1. **Immunostaining of Sp1 in SCLC cells treated with CuSO<sub>4</sub> or TM.** Cells were plated on cover slides and treated with 100  $\mu$ M CuSO<sub>4</sub> or 40  $\mu$ M TM for 16 hr. Immunostaining was performed with anti-Sp1 antibody and counterstained with propidium iodide. Images were viewed by confocal microscopy.
